# Supplementary material
Source: PubMed Central journal article supplement (PMC9361187)
Supplement: jamainternmed-e223050-s004.pdf [file jamainternmed-e223050-s004.pdf]

## Data Sharing Statement

Jamshed. Effectiveness of Early Time-Restricted Eating for Weight Loss, Fat Loss, and Cardiometabolic Health in Adults With Obesity. *JAMA Intern Med.* Published August 08, 2022. doi:10.1001/jamainternmed.2022.3050

### Data

**Data available:** Yes

**Data types:** Deidentified participant data

**How to access data:** Send requests for participant data to the corresponding author, Dr. Courtney Peterson, at [cpeterso@uab.edu](mailto:cpeterso@uab.edu).

**When available:** Beginning date: 01-01-2023

### Supporting Documents

**Document types:** None

### Additional Information

**Who can access the data:** Any scientific researchers who request

**Types of analyses:** For any purpose

**Mechanisms of data availability:** With a signed data access agreement
